# Supplementary material for: Imidazole-based AIEgens for highly sensitive and selective detection of picric acid
Source: Royal Society of Chemistry journal article supplement (doi:10.1039/d2ce00953f), 2022-01-01
Supplement: d2ce00953f1.pdf [file d2ce00953f1.pdf]

## Supporting Information

### Imidazole-based AIEgens for highly sensitive and selective detection of picric acid

Yuzhu Zhang,<sup>a,1</sup> Fang Tang,<sup>b,1</sup> Xuan He,<sup>a</sup> Chengyuan Wang,<sup>a</sup> Lin Kong,<sup>a</sup> Jiaxiang Yang,<sup>a,\*</sup>  
and Aixiang Ding<sup>b,\*</sup>

<sup>a</sup>*College of Chemistry and Chemical Engineering, Key Laboratory of Structure and Functional Regulation of Hybrid Materials (Anhui University), Ministry of Education, Photoelectric Conversion Energy Materials and Devices Key Laboratory of Anhui Province, Anhui University, Hefei, 230061, PR China. Email: jxyang@ahu.edu.cn*

<sup>b</sup>*The Institute of Flexible Electronics (IFE, Future Technologies), Xiamen University, Xiamen, 361005, PR China. Email: dingaixiangwo@gmail.com*

<sup>1</sup>*These authors contributed equally to this work.*

## Synthesis

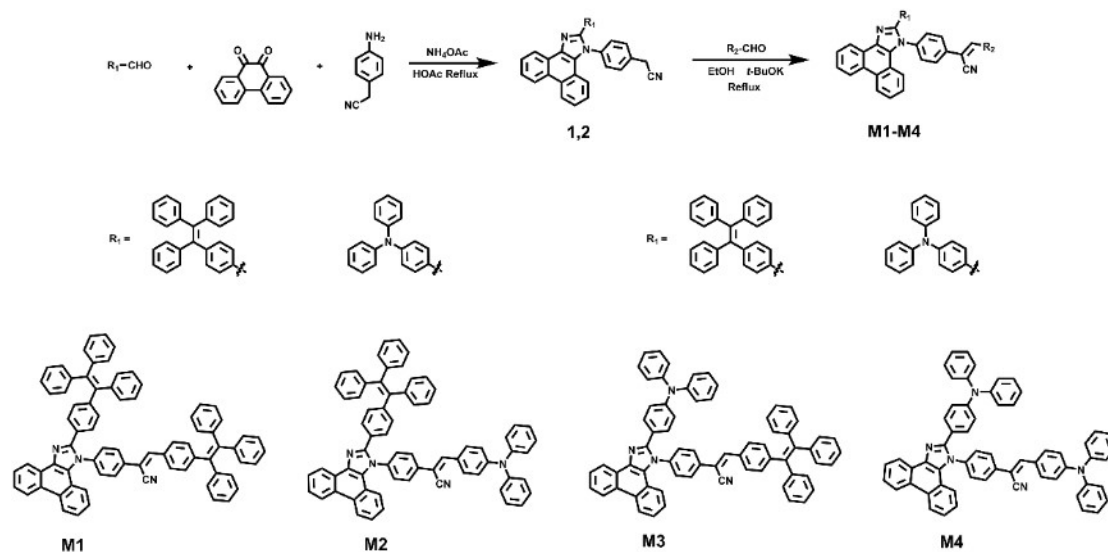

**Scheme S1.** Synthetic routes of compounds **M1**, **M2**, **M3**, and **M4**.

### Synthesis of compound 1

Phenanthrenequinone (1.00g, 4.80 mmol) and tetraphenyl monaldehyde (2.08 g, 5.76 mmol) were dissolved in anhydrous acetic acid (30 mL) at room temperature. 2-(4-Aminophenyl) acetonitrile (0.95 g, 7.20 mmol) was dissolved in glacial acetic acid (10 mL) and was gradually added into this mixture solution. The mixture was stirred for 2 h at 25 °C. Then, ammonium acetate (1.48 g, 19.21 mmol) was added and the mixture was heated to 120 °C for 12 h. The final mixture was poured into brine (200mL) and was neutralized with NaOH aqueous solution. A large amount of precipitate was filtered and washed with ethanol to afford green compound **1** (2.00 g, 3.01 mmol). Yield: 63%. FT-IR (KBr,  $\text{cm}^{-1}$ ): 3053, 3022, 2920, 2251, 1611, 1514, 1447, 1148, 1022, 753, 700.  $^1\text{H}$  NMR ( $\text{CDCl}_3$ , 400 MHz, ppm)  $\delta$ : 3.95 (s, 2H), 6.95-7.01 (m, 8H), 7.09-7.17 (m, 10H), 7.25-7.27 (m, 2H), 7.47-7.55 (m, 5H), 7.64 (t,  $J=7.68$  Hz, 1H), 7.73 (t,  $J=7.16$  Hz, 1H), 8.69 (d,  $J=8.20$  Hz, 1H), 8.76 (d,  $J=8.20$  Hz, 1H), 8.83 (d,  $J=8.00$  Hz, 1H).

### Synthesis of compound 2

Phenanthrenequinone (1.00 g, 4.80 mmol) and tetraphenyl monaldehyde (2.08 g, 5.76 mmol) were dissolved in anhydrous acetic acid (30 mL) at room temperature. 2-(4-Aminophenyl) acetonitrile (0.95 g, 7.20 mmol), was dissolved in glacial acetic acid

(10 mL) and was gradually added into this mixture solution. The mixture was stirred for 2 h at 25 °C. Then, ammonium acetate (1.48 g, 19.21 mmol) was added and the mixture was heated to 120 °C for 12 h. The final mixture was poured into brine (200 mL) and was neutralized with NaOH aqueous solution. A large amount of precipitate was filtered and washed with ethanol to afford green compound **1** (2.00 g, 3.47 mmol). Yield: 72%. FT-IR (KBr,  $\text{cm}^{-1}$ ): 3058, 3035, 2244, 1588, 1515, 1445, 1325, 1270, 1171, 758, 694.  $^1\text{H}$  NMR ( $\text{CDCl}_3$ , 400 MHz, ppm)  $\delta$ : 3.74 (s, 2H), 6.90 (d,  $J$  = 8.72 Hz, 2H), 7.06-7.11 (m, 10H), 7.24-7.32 (m, 14H), 7.63 (d,  $J$  = 7.80 Hz, 2H).

#### Synthesis of compound **M1**

Compound **1** (0.3g, 0.45 mmol) and TPE-CHO (0.17g, 0.47mmol) were uniformly dispersed in ethanol (20 mL) at 80 °C. Soon afterwards, *t*-BuOK (0.10 g, 0.90 mmol) was added. The reaction mixture was refluxed for 4 h. The final mixture was poured into brine (200 mL). The generated green precipitate was filtered and further purified by column chromatography (petroleum ether: ethyl acetate = 4:1, v/v) to afford compound **M1** (0.37 g, 0.37 mmol). Yield: 81%. FT-IR (KBr,  $\text{cm}^{-1}$ ): 3052, 30234, 2923, 2849, 2215, 1598, 1513, 1444, 1186, 853, 752, 672.  $^1\text{H}$  NMR ( $\text{CDCl}_3$ , 400 MHz, ppm)  $\delta$ : 6.95-7.27 (m, 3H), 7.59 (s, 1H), 7.64 (d,  $J$  = 7.70 Hz, 1H), 7.71-7.76 (m, 3H), 7.82 (d,  $J$  = 7.70 Hz, 2H), 8.69 (d,  $J$  = 8.40 Hz, 1H), 8.76 (d,  $J$  = 8.40 Hz, 1H), 8.83 (d,  $J$  = 7.92 Hz, 1H).  $^{13}\text{C}$  NMR ( $\text{CDCl}_3$ , 100 MHz, ppm)  $\delta$ : 117.85, 120.74, 122.79, 122.83, 123.12, 124.23, 125.01, 125.73, 126.39, 126.62, 126.84, 127.00, 127.11, 127.22, 127.35, 127.68, 127.73, 127.68, 127.73, 127.89, 127.94, 128.09, 128.29, 128.74, 129.03, 129.30, 129.75, 131.23, 131.30, 131.37, 131.44, 132.12, 135.83, 137.60, 139.13, 139.93, 140.16, 141.74, 142.72, 143.08, 143.26, 143.37, 143.44, 143.50, 144.61, 147.28, 150.92. HR-MS (APCI-MS):  $m/z$   $[(\text{M}+\text{H})^+]$  calcd : 1006.4083, found = 1006.4161.

#### Synthesis of compound **M2**

Compound **1** (0.20 g, 0.30 mmol) and TPA-CHO (0.91 g, 0.33 mmol) were uniformly dispersed in ethanol (20 mL) at 80 °C. Soon afterwards, *t*-BuOK (0.068 g, 0.60 mmol) was added. The reaction mixture was refluxed for 4 h. The final mixture was poured into brine (100 mL). The generated green precipitate was filtered and

further purified by column chromatography (petroleum ether: ethyl acetate = 4:1, v/v) to afford compound **M2** (0.20 g, 0.22 mmol). Yield: 72%. FT-IR (KBr,  $\text{cm}^{-1}$ ): 3055, 3024, 2922, 2849, 2214, 1592, 1489, 1445, 1279, 1028, 751, 698.  $^1\text{H}$  NMR ( $\text{CDCl}_3$ , 400 MHz, ppm)  $\delta$ : 6.82 (d,  $J = 8.88$  Hz, 1H), 6.90-7.21 (m, 27H), 7.24-7.39 (m, 8H), 7.43-7.51 (m, 2H), 7.60-7.66 (m, 2H), 7.70-7.74 (m, 1H), 7.81-7.88 (m, 2H), 8.68-8.70 (m, 1H), 8.73-8.77 (m, 1H), 8.81-8.84 (m, 1H).  $^{13}\text{C}$  NMR ( $\text{CHCl}_3$ , 100 MHz, ppm)  $\delta$ : 109.31, 117.96, 120.72, 121.96, 122.90, 122.99, 123.19, 123.37, 123.69, 124.31, 124.93, 125.23, 125.73, 126.46, 126.90, 127.07, 127.38, 127.22, 127.49, 127.81, 127.97, 128.02, 128.34, 129.13, 129.28, 129.47, 129.96, 130.20, 131.32, 131.38, 131.45, 132.16, 136.08, 137.69, 139.50, 140.01, 143.17, 142.77, 143.34, 143.52, 147.24, 147.32, 148.63, 150.98. HR-MS (APCI-MS):  $m/z$   $[(\text{M}+\text{H})^+]$  calcd : 919.3722, found = 919.3813.

#### Synthesis of compound **M3**

Compound **2** (0.15 g, 0.23 mmol) and TPE-CHO (0.068 g, 0.25 mmol) were uniformly dispersed in ethanol (20 mL) at 80 °C. Soon afterwards, *t*-BuOK (0.051 g, 0.45 mmol) was added. The reaction mixture was refluxed for 4 h. The final mixture was poured into brine (100 mL). The generated green precipitate was filtered and further purified by column chromatography (petroleum ether : ethyl acetate = 4 : 1, v/v) to afford compound **M3** (0.15 g, 0.16 mmol). Yield: 72%. FT-IR (KBr,  $\text{cm}^{-1}$ ): 3055, 3024, 2922, 2849, 2214, 1592, 1489, 1445, 1279, 1028, 751, 698.  $^1\text{H}$  NMR ( $\text{CDCl}_3$ , 400 MHz, ppm)  $\delta$ : 6.95-7.29 (m, 33H), 7.49-7.53 (m, 3H), 7.59 (s, 1H), 7.64 (t,  $J = 7.72$  Hz, 1H), 7.71-7.76 (m, 3H), 7.82 (d,  $J = 7.68$  Hz, 2H), 8.69 (d,  $J = 8.24$  Hz, 1H), 8.76 (d,  $J = 8.44$  Hz, 1H), 8.83 (d,  $J = 7.92$  Hz, 1H).  $^{13}\text{C}$  NMR ( $\text{CHCl}_3$ , 100 MHz, ppm)  $\delta$ : 109.15, 120.06, 120.67, 122.89, 123.17, 124.28, 124.79, 125.03, 125.29, 125.81, 125.96, 1226.10, 126.25, 126.72, 127.44, 127.74, 127.81, 127.89, 128.08, 128.33, 128.84, 129.38, 129.76, 129.97, 130.81, 131.39, 131.43, 131.49, 135.03, 137.71, 139.20, 140.21, 141.82, 143.23, 143.51, 144.85, 145.46, 146.37, 150.23, 151.03. HR-MS (APCI-MS):  $m/z$   $[(\text{M}+\text{H})^+]$  calcd : = 918.3722, found = 918.3828.

#### Synthesis of compound **M4**

Compound **2** (0.20 g, 0.35 mmol) and TPA-CHO (0.10 g, 0.38 mmol) were uniformly dispersed in ethanol (20 mL) at 80 °C. Soon afterwards, *t*-BuOK (0.078 g, 0.38 mmol) was added. The reaction mixture was refluxed for 4 h. The final mixture was poured into brine (100 mL). The generated green precipitate was filtered and further purified by column chromatography (petroleum ether : ethyl acetate = 4 : 1, v/v) to afford compound **M4** (0.20 g, 0.24 mmol). Yield: 69%. FT-IR (KBr, cm<sup>-1</sup>): 3058, 3034, 2921, 2847, 2365, 2198, 1589, 1489, 1332, 1279, 1195, 1074, 828, 749, 692, 508. <sup>1</sup>H NMR (CDCl<sub>3</sub>, 400 MHz, ppm) δ: 6.96 (d, *J* = 8.84 Hz, 2H), 7.02-7.36 (m, 24H), 7.44 (d, *J* = 8.84 Hz, 2H), 7.51 (t, *J* = 8.24 Hz, 1H), 7.59 (d, *J* = 8.24 Hz, 3H), 7.65 (t, *J* = 8.36 Hz, 1H), 7.73 (d, *J* = 7.08 Hz, 1H), 7.85 (q, *J* = 8.60 Hz, 4H), 8.70 (t, *J* = 8.28 Hz, 1H), 8.77 (d, *J* = 8.32 Hz, 1H), 8.86 (d, *J* = 8.00 Hz, 1H). <sup>13</sup>C NMR (CHCl<sub>3</sub>, 100 MHz, ppm) δ: 106.05, 118.66, 120.29, 120.50, 120.77, 121.97, 122.91, 123.03, 123.19, 123.69, 124.28, 124.72, 124.83, 124.92, 125.18, 125.23, 125.71, 125.84, 125.90, 126.07, 126.48, 127.21, 127.37, 128.01, 128.35, 129.26, 129.48, 129.76, 129.85, 130.22, 131.13, 136.53, 137.61, 138.92, 143.25, 146.50, 147.25, 148.62, 150.62, 150.99. HR-MS (APCI-MS): *m/z* [(M+H)<sup>+</sup>] calcd : 832.3362, found = 832.3439.

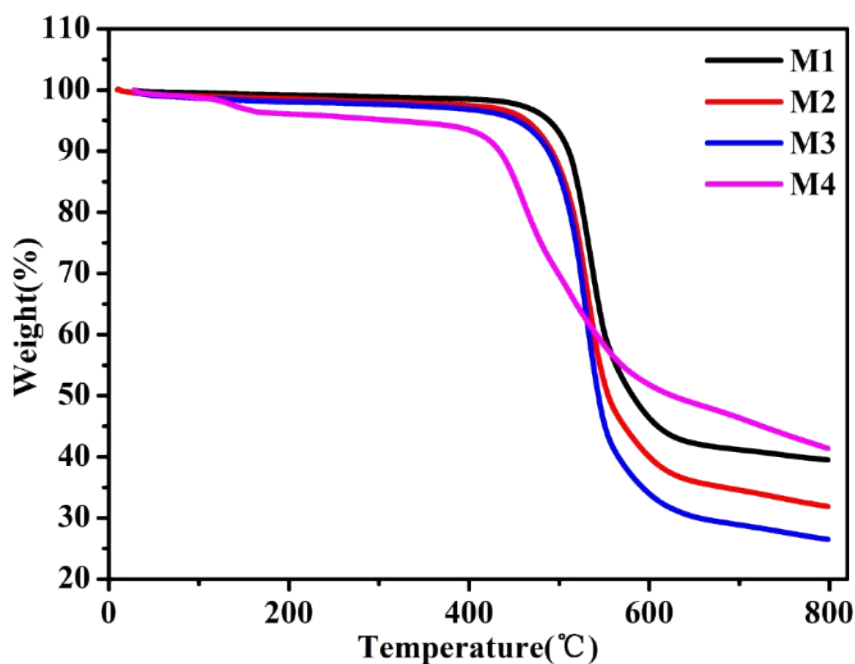

Fig. S1. The TGA curve of compounds **M1**, **M2**, **M3**, and **M4**.

**Table S1** Summary of crystallographic data and structure refinement details for **M3**.

|                     |                                                |                                                     |                                                                               |
|---------------------|------------------------------------------------|-----------------------------------------------------|-------------------------------------------------------------------------------|
| Identification code | <b>M3</b>                                      | Volume                                              | 5791.5(2) Å <sup>3</sup>                                                      |
| Empirical formula   | C <sub>68</sub> H <sub>46</sub> N <sub>4</sub> | Z, Calculated density                               | 4, 1.054 g cm <sup>-3</sup>                                                   |
| Formula weight      | 919.09                                         | Absorption coefficient                              | 0.472 mm <sup>-1</sup>                                                        |
| Temperature         | 273.15 K                                       | <i>F</i> (000)                                      | 1928.0                                                                        |
| Wavelength          | 1.54178 Å                                      | 2θ range for data collection                        | 4.128 to 137.984°                                                             |
| Crystal system      | monoclinic                                     |                                                     | -25 ≤ <i>h</i> ≤ 25                                                           |
| Space group         | P-2 <sub>1</sub> /C                            | Index ranges                                        | -33 ≤ <i>k</i> ≤ 33                                                           |
| <i>a</i>            | 21.4031(5) Å                                   |                                                     | -11 ≤ <i>l</i> ≤ 10                                                           |
| <i>b</i>            | 27.8054(6) Å                                   | Data/restraints/parameters                          | 10684/1/650                                                                   |
| <i>c</i>            | 9.7334(2) Å                                    | Goodness-of-fit on <i>F</i> <sup>2</sup>            | 0.991                                                                         |
| <i>α</i>            | 90°                                            | Final <i>R</i> indices [ <i>I</i> > 2σ( <i>I</i> )] | <i>R</i> <sub>1</sub> = 0.0763, w <i>R</i> <sub>2</sub> = 0.2052              |
| <i>β</i>            | 91.110(2)°                                     | Final <i>R</i> indices (all data)                   | <i>R</i> <sub>1</sub> = 0.1259, w <i>R</i> <sub>2</sub> = 0.2524              |
|                     |                                                | Reflections collected                               | 109458                                                                        |
| <i>γ</i>            | 90°                                            | Independent reflections                             | 10684 [ <i>R</i> <sub>int</sub> = 0.1167, <i>R</i> <sub>sigma</sub> = 0.0494] |

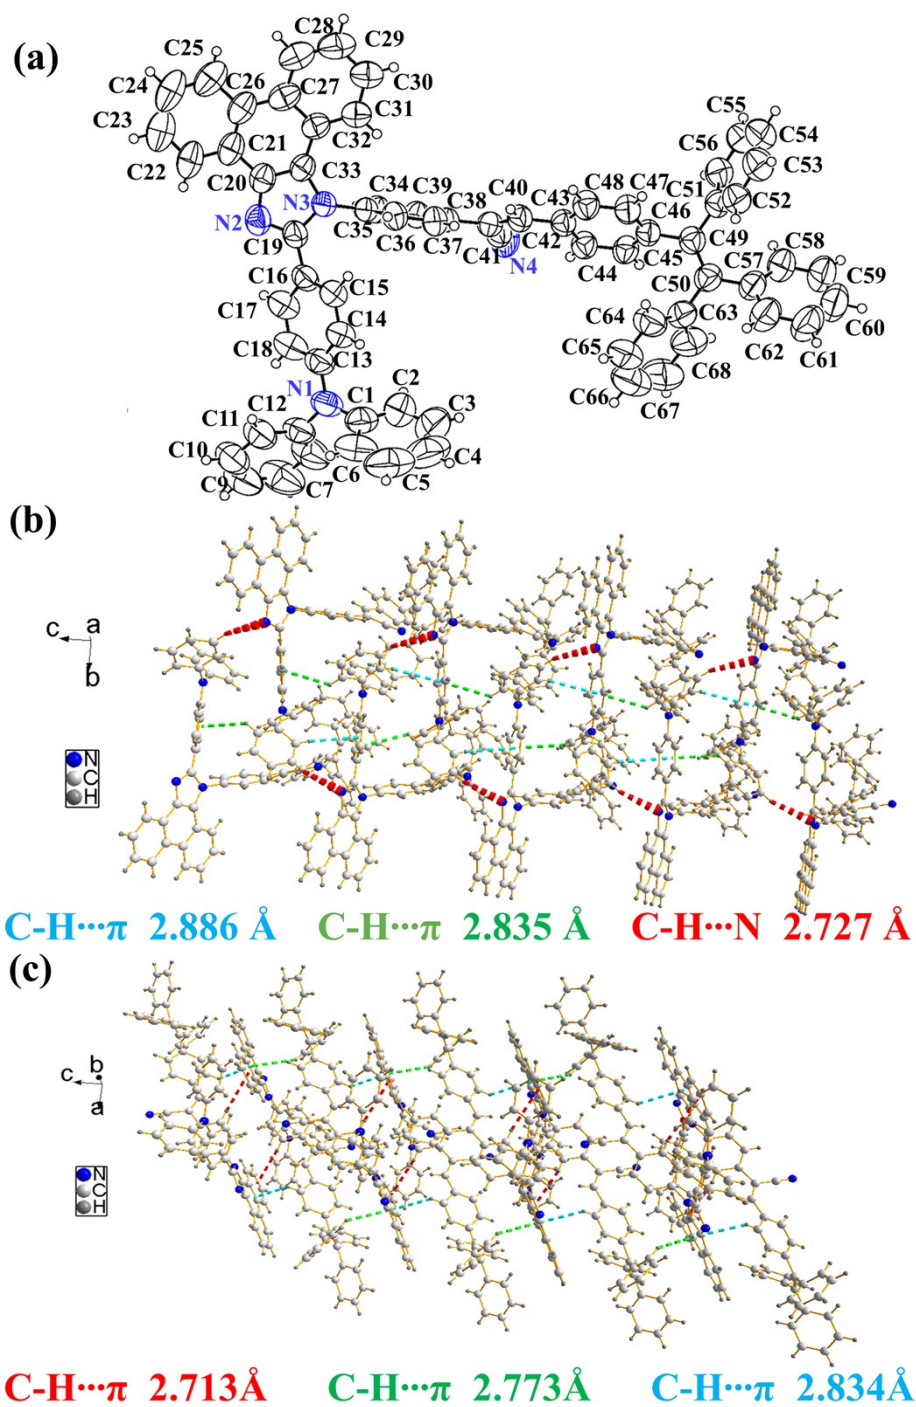

**Fig. S2.** The weak interactions in the single crystal of **M3**.

**Table S2** A summary of weak interactions of compound **M3** in its crystalline phase.

| Compound  | Intermolecular Interactions | Selected bond distances/[Å] |
|-----------|-----------------------------|-----------------------------|
| <b>M3</b> | C9-H9...N2                  | 2.727                       |
|           | C8-H8... $\pi$              | 2.886                       |
|           | C12-H12... $\pi$            | 2.835                       |
|           | C48-H48... $\pi$            | 2.834                       |
|           | C56-H56... $\pi$            | 2.713                       |
|           | C56-H56... $\pi$            | 2.773                       |

**Table S3** The linear optical parameters of compounds **M1**, **M2**, **M3**, and **M4** in different solvents.

| Compounds | Solvents     | $\lambda_{\max}^{[a]}$ | $\lambda_{\max}^{[b]}$ | $\varepsilon (\times 10^4)^{[c]}$ | $\Delta\nu/\text{cm}^{-1}^{[d]}$ | $\Phi^{[e]}$ |
|-----------|--------------|------------------------|------------------------|-----------------------------------|----------------------------------|--------------|
| <b>M1</b> | benzene      | 368                    | 503                    | 5.27                              | 7293                             | 0.61         |
|           | DCM          | 367                    | 518                    | 4.63                              | 7943                             |              |
|           | THF          | 367                    | 511                    | 4.74                              | 7679                             |              |
|           | EA           | 363                    | 509                    | 4.48                              | 7902                             |              |
|           | EtOH         | 362                    | 503                    | 3.69                              | 7744                             |              |
|           | acetonitrile | 362                    | 497                    | 3.63                              | 7504                             |              |
|           | DMF          | 365                    | 515                    | 3.90                              | 7980                             |              |
| <b>M2</b> | benzene      | 369                    | 506                    | 3.84                              | 7337                             | 0.08         |
|           | DCM          | 368                    | 526                    | 3.59                              | 8163                             |              |
|           | THF          | 369                    | 518                    | 4.15                              | 7795                             |              |
|           | EA           | 367                    | 519                    | 3.74                              | 7980                             |              |
|           | EtOH         | 364                    | 524                    | 3.17                              | 8389                             |              |
|           | acetonitrile | 364                    | 537                    | 3.40                              | 8851                             |              |
|           | DMF          | 369                    | 541                    | 3.33                              | 8616                             |              |
| <b>M3</b> | benzene      | 369                    | 543                    | 4.72                              | 8684                             | 0.15         |
|           | DCM          | 367                    | 431                    | 4.82                              | 4046                             |              |
|           | THF          | 369                    | 405                    | 5.27                              | 2489                             |              |
|           | EA           | 364                    | 520                    | 5.07                              | 8242                             |              |
|           | EtOH         | 363                    | 430                    | 4.47                              | 4292                             |              |
|           | acetonitrile | 360                    | 426                    | 4.71                              | 4304                             |              |
|           | DMF          | 367                    | 436                    | 4.28                              | 4312                             |              |
| <b>M4</b> | benzene      | 370                    | 423                    | 3.80                              | 3386                             | 0.12         |
|           | DCM          | 369                    | 425                    | 3.63                              | 3571                             |              |
|           | THF          | 369                    | 421                    | 4.19                              | 3347                             |              |
|           | EA           | 366                    | 420                    | 3.76                              | 3513                             |              |
|           | EtOH         | 363                    | 427                    | 3.22                              | 4184                             |              |
|           | acetonitrile | 364                    | 428                    | 3.39                              | 4108                             |              |
|           | DMF          | 369                    | 428                    | 3.36                              | 3736                             |              |

[a] Peak position of the longest absorption band. [b] Peak position of fluorescence emission, excited at the absorption maximum. [c] Molar absorptivity (L/cm/mol). [d] Stokes' shift in  $\text{cm}^{-1}$ . [e] Quantum yields in solid state

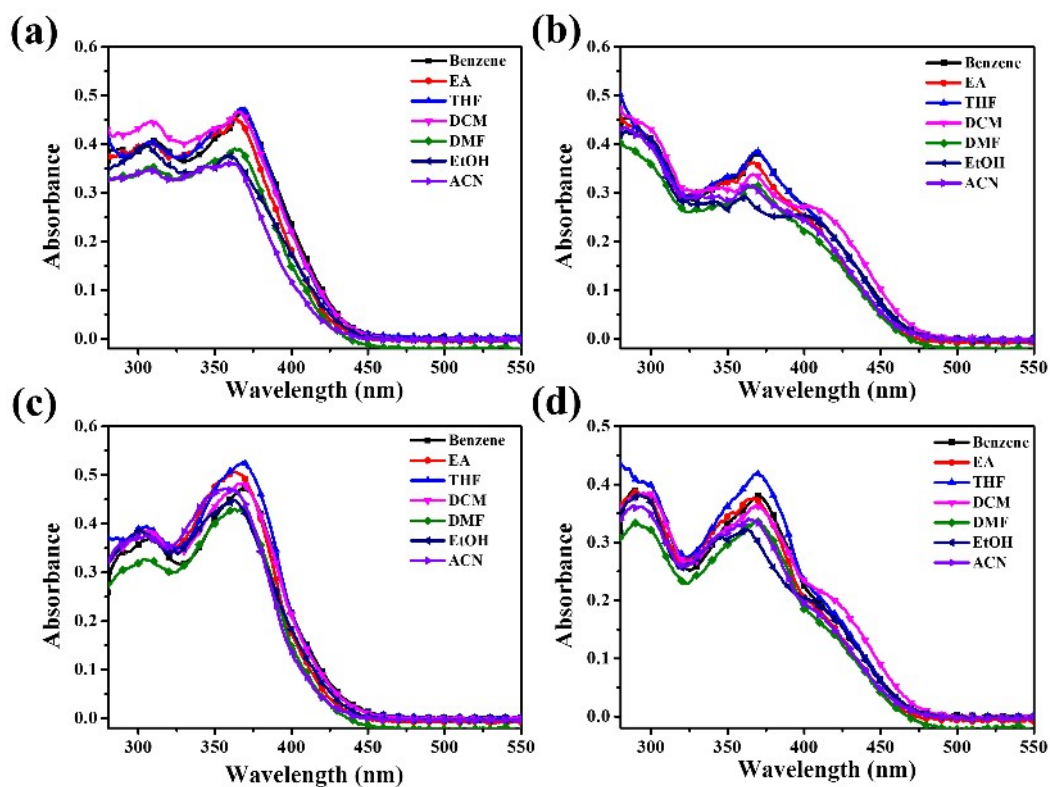

**Fig. S3.** UV-vis spectra of compounds (a) **M1**, (b) **M2**, (c) **M3**, and (d) **M4** in different solvents (10  $\mu$ M).

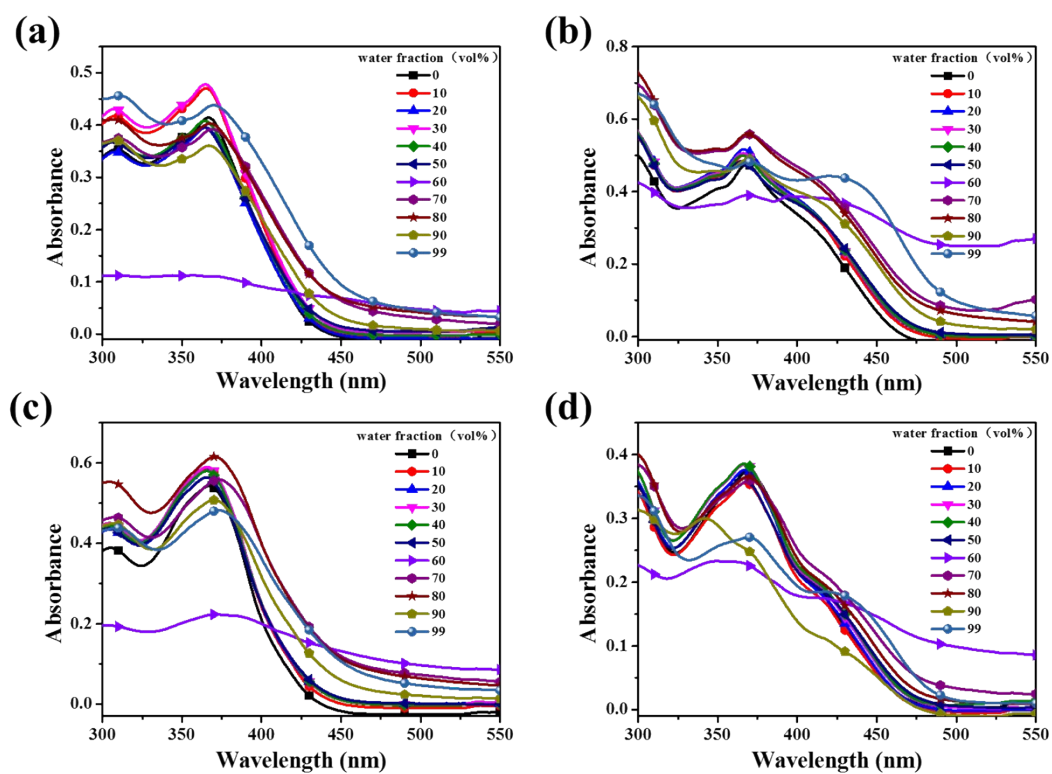

**Fig. S4.** UV-vis spectra of (a) **M1**, (b) **M2**, (c) **M3**, and (d) **M4** at 10  $\mu$ M in THF/H<sub>2</sub>O mixtures with different water fractions.

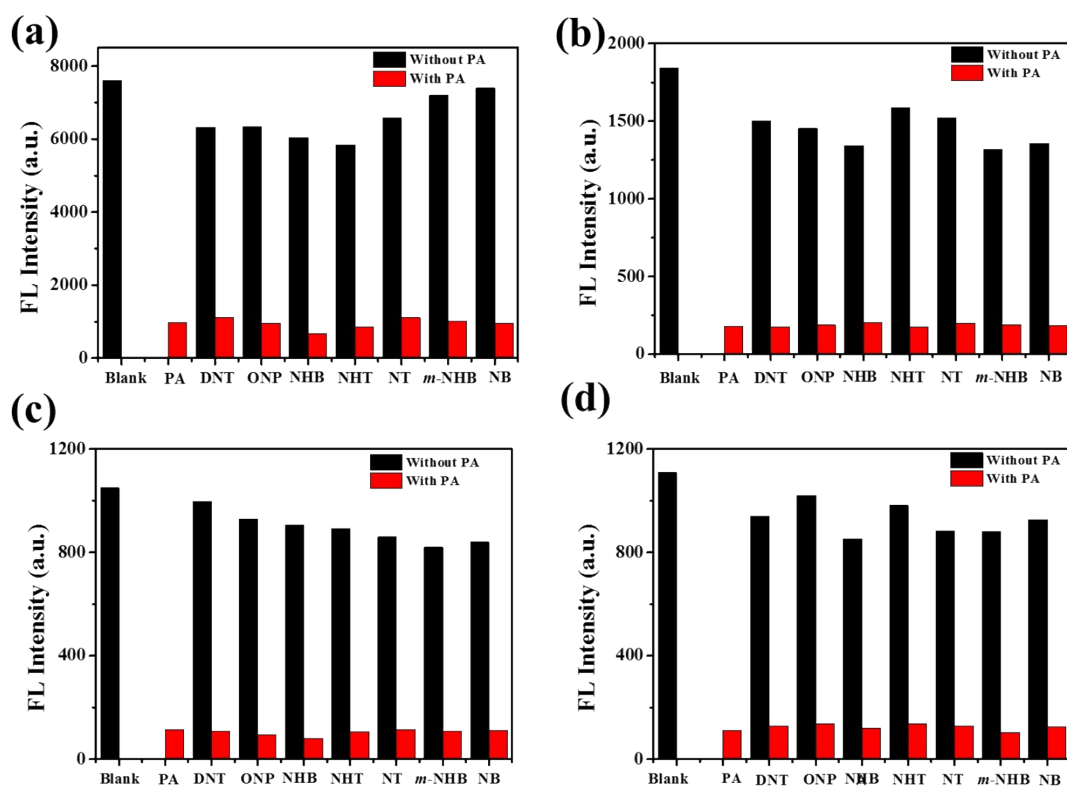

**Fig. S5.** Quenching percentages of compounds (a) **M1**, (b) **M2**, (c) **M3**, and (d) **M4** (10  $\mu$ M) with different NACs (15 equiv.) in THF/H<sub>2</sub>O (1/99, v/v) mixtures before (black) and after (red) the addition of PA (15 equiv.).

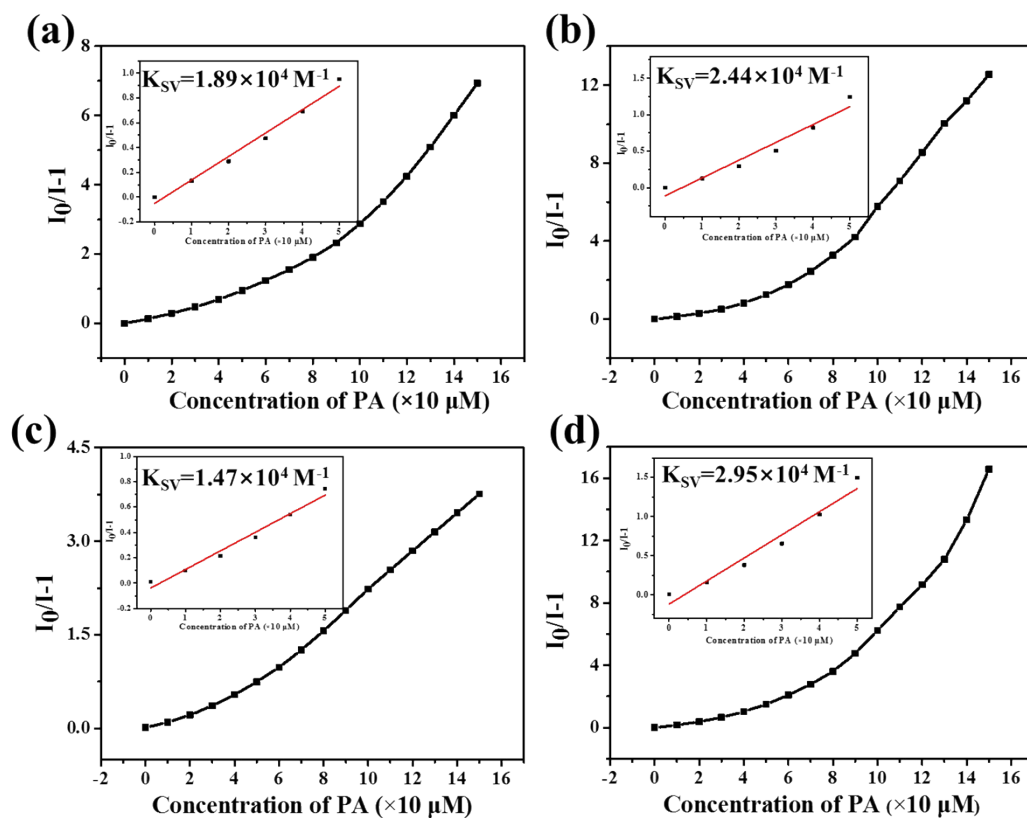

**Fig. S6.** Stern-Volmer plot of (a) **M1**, (b) **M2**, (c) **M3**, and (d) **M4** in response to PA.

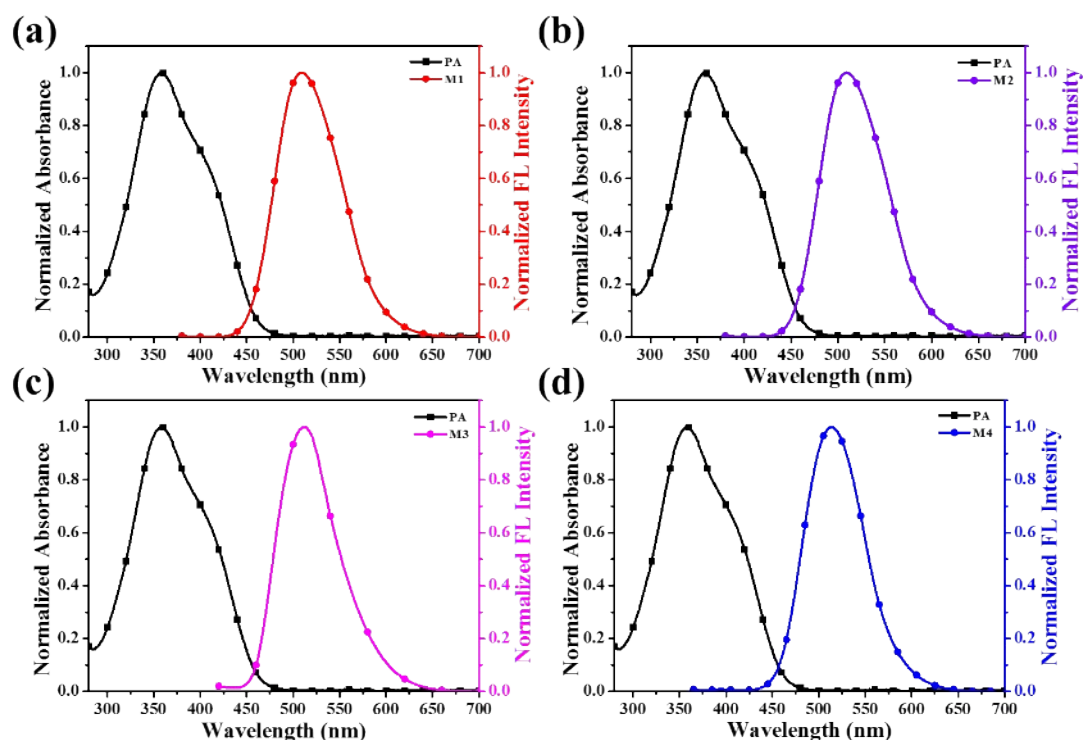

**Fig. S7.** Normalized UV-vis absorption spectra of PA and normalized fluorescence of (a) M1, (b) M2, (c) M3, and (d) M4.

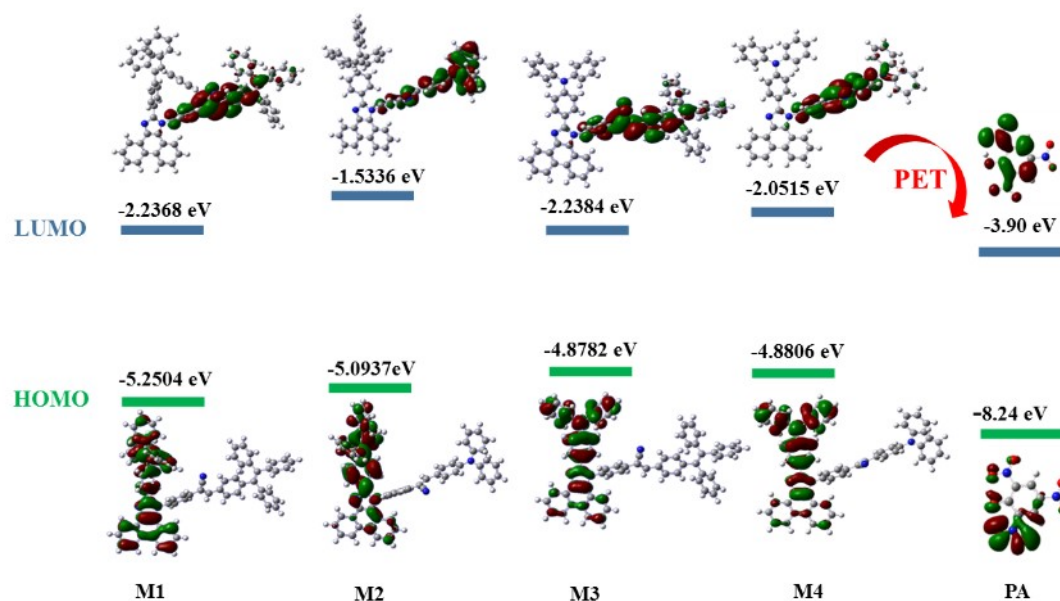

**Fig. S8.** Optimized molecular structures and molecular orbital amplitude plots of the LUMO and HOMO levels, energy gaps and electron cloud distribution of M1, M2, M3, M4, and PA calculated using the B3LYP/6-31G\* basis set.



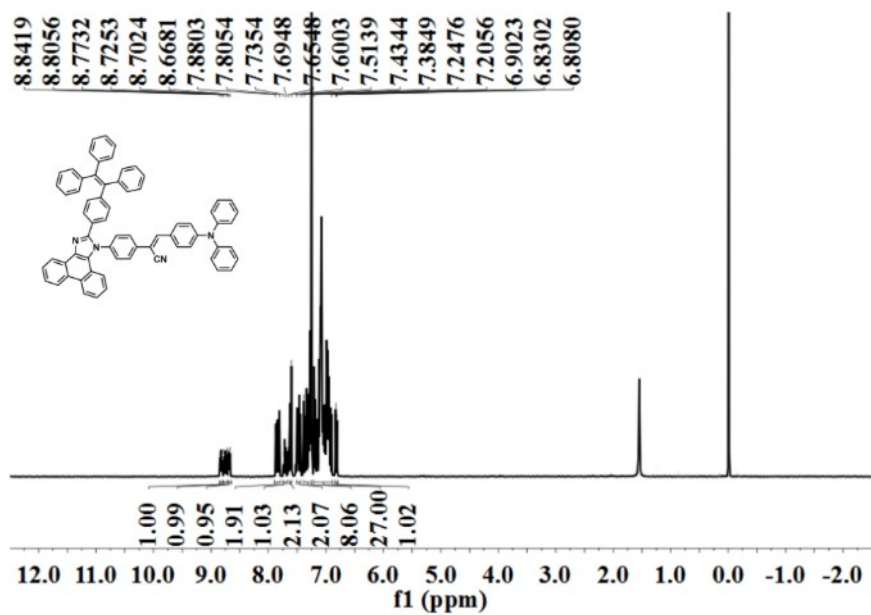

**Fig. S11.** <sup>1</sup>H NMR spectrum of compound **M2** in CDCl<sub>3</sub>.

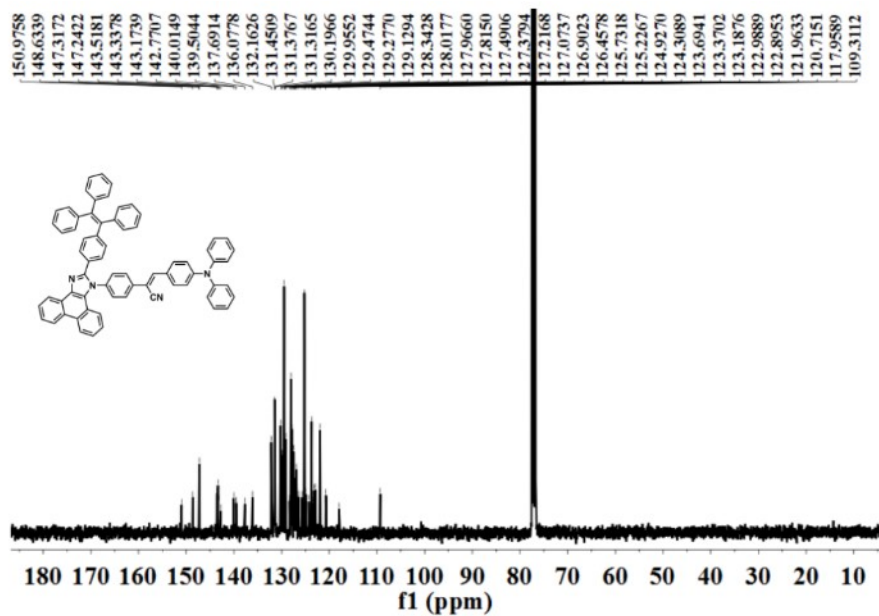

**Fig. S12.** <sup>13</sup>C NMR spectrum of compound **M2** in CDCl<sub>3</sub>.

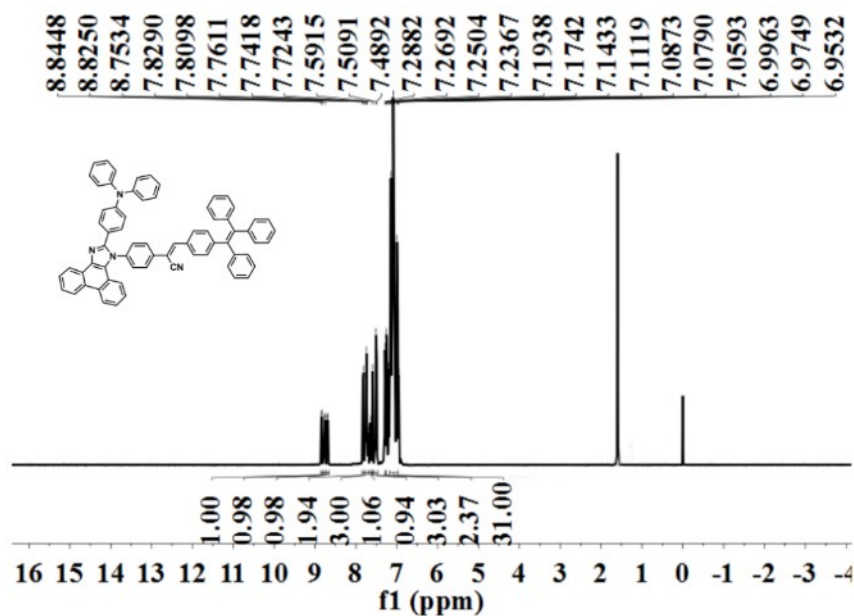

Fig. S13. <sup>1</sup>H NMR spectrum of compound **M3** in CDCl<sub>3</sub>.

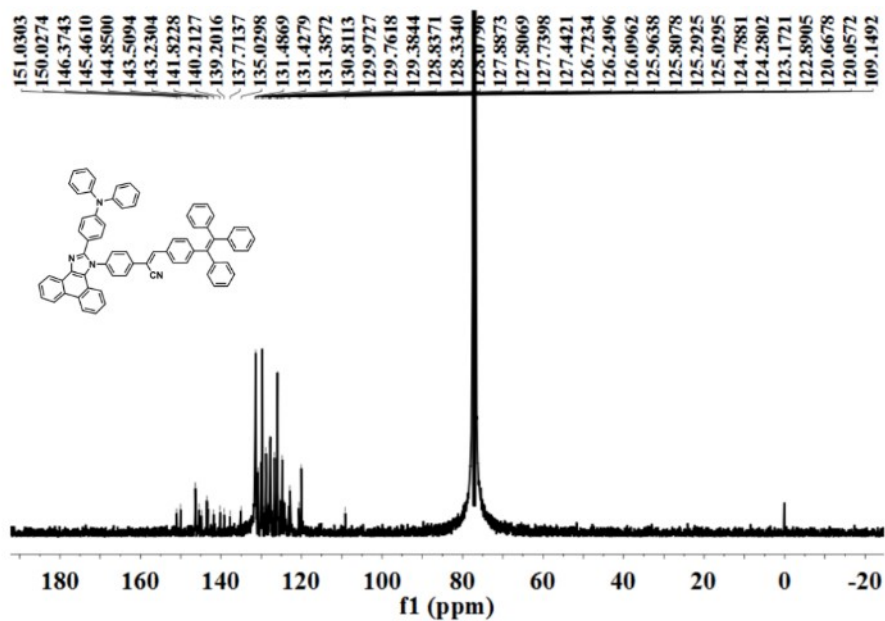

Fig. S14. <sup>13</sup>C NMR spectrum of compound **M3** in CDCl<sub>3</sub>.

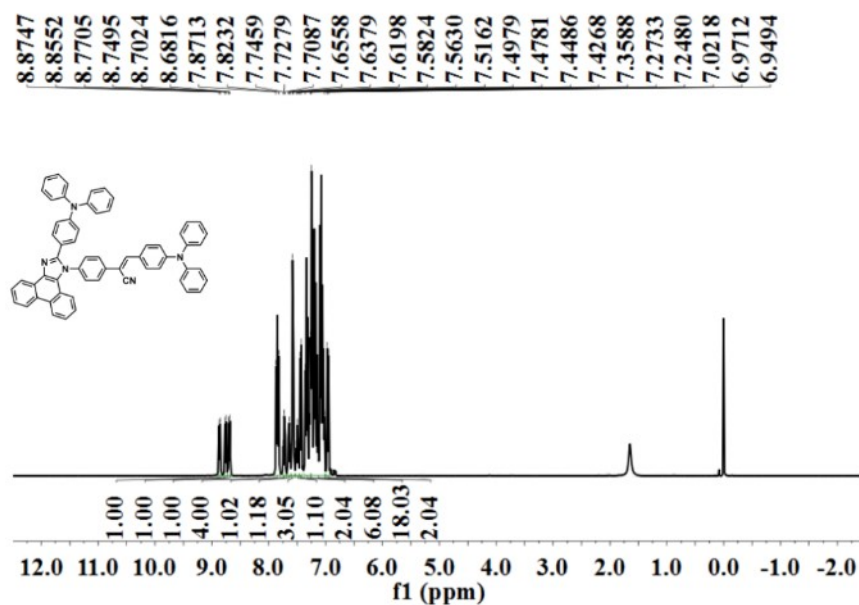

Fig. S15.  $^1\text{H}$  NMR spectrum of compound **M4** in  $\text{CDCl}_3$ .

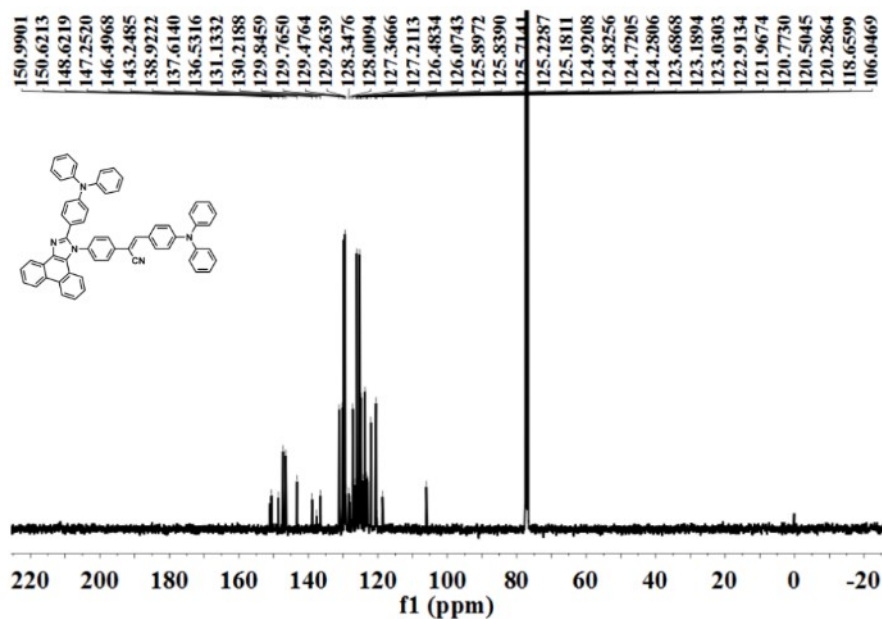

Fig. S16.  $^{13}\text{C}$  NMR spectrum of compound **M4** in  $\text{CDCl}_3$ .
